# Supplementary material for: Diversity of Parasitoid Wasps and Comparison of Sampling Strategies in Rice Fields Using Metabarcoding
Source: Preprints.org preprint supplement (doi:10.20944/preprints202401.2105.v1), 2024-01-30
Supplement: Supplementary file 1 [file supplementary]

## Sheet: Sheet1
ZW2	Table S1 Alpha diversity estimates of all samples.
ZZ1	Sample	Reads	Chao	Richness	Shannon	Simpson	ACE	Evenness	coverage
ZZ2	AW1	313872	37295	36137	10.5136	0.0242	39546.4	0.694374	0.980355
HW1	AW2	339361	35327.3	33085	10.3314	0.0169	38786.7	0.688126	0.977275
HW2	AZ1	397319	55790.3	41910	8.4038	0.1385	62219.8	0.547301	0.950926
HZ1	AZ2	271940	38464.2	32072	9.6955	0.0505	44163.4	0.647709	0.955593
HZ2	ZW1	353621	51910.4	37782	9.0561	0.0656	60718.5	0.595586	0.948971
	ZW2	369011	37833.9	36469	10.5793	0.0139	40581.9	0.698103	0.982567
CHA	ZZ1	339931	35986	32390	8.7323	0.107	39056.2	0.582808	0.97075
CHB	ZZ2	60585	12903	10437	9.5931	0.0149	14479	0.718619	0.933201
ZCA	HW1	238695	43057.7	32300	9.857	0.0435	50789.8	0.658046	0.93862
ZCB	HW2	361265	53362	48528	10.5484	0.0458	58367.3	0.67764	0.961458
H1	HZ1	297244	58398.3	40618	9.4173	0.0851	67856.8	0.615117	0.930865
H12	HZ2	64716	8315.25	7471	8.6075	0.0364	9232.1	0.668956	0.96857
	CHA	537249	2265.46	2259	5.543	0.0986	2279.82	0.497515	0.99989
	CHB	688122	1404	1334	4.4531	0.126	1413.21	0.428949	0.999795
	ZCA	630941	696.82	695	3.4874	0.2372	699.446	0.369404	0.999978
	ZCB	541893	1639.51	1628	4.5547	0.1473	1655.18	0.426918	0.999875
	WSA	516566	803.542	802	6.1504	0.0283	806.322	0.63752	0.999973
	WSB	535387	229.375	229	4.8563	0.053	230.661	0.619499	0.999993
